# Supplementary material for: An inhibitor of apoptosis (SfIAP) interacts with SQUAMOSA promoter‐binding protein (SBP) transcription factors that exhibit pro‐cell death characteristics
Source: PubMed Central journal article supplement (PMC6508781; doi:10.1002/pld3.81), 2018-08-10
Supplement: PLD3-2-e00081-s001.pdf [file PLD3-2-e00081-s001.pdf]

**Supplementary Table S1:** Summary of primers used in this study.

| Target gene                 | Sequence                                                                            | Purpose                                                     |
|-----------------------------|-------------------------------------------------------------------------------------|-------------------------------------------------------------|
| SflAP                       | fwd: 5'-CGGAATTCATGTGGTCGTGTTTCTTACCT-3'<br>rev: 5'-CGGGATCCTCACGAGAAATATAACCGCA-3' | Yeast two-hybrid                                            |
| SflAP <sub>BIR1</sub>       | fwd: 5'- CCGGAATTCATGAGTGCGGACACAGT-3'<br>rev: 5'- CCGCTCGAGTCATGCTGCAGTACCGTTC-3'  | Yeast two-hybrid                                            |
| pB42AD                      | fwd: 5'-TCATGAAATTGAAGCGGATGTT-3'<br>rev: 5'-CAACAACGTATCTACCAACGATTT-3'            | Yeast two-hybrid                                            |
| SflAP <sup>M4</sup> (I332A) | fwd: 5'-ATGAGAAAAGAGGATGAACGTATGAAAAC-3'<br>rev: 5'-TCACGAGAAATATAACCGCACTGC-3'     | CoIP                                                        |
| SlySBP-like                 | fwd: 5'-ATGGCAAACAATGATGCTGG-3'<br>rev: 5'-TCATCCAGAGATGTCAGCAG-3'                  | Overexpression in <i>N. benthamiana</i>                     |
| SlySBP4                     | fwd: 5'-ATGGAAACAGCTAATAATCAGTT-3'<br>rev: 5'-TCAACGTAAGTGAAAGTTTTTGTG-3'           | Overexpression in <i>N. benthamiana</i>                     |
| SlySBP6a                    | fwd: 5'-ATGGAGTCATGGAGCTATTTTTTCAG-3'<br>rev: 5'-CTAAGTATGTCTTGGCATGCAAAG-3'        | Overexpression in <i>N. benthamiana</i>                     |
| SlySBP6c                    | fwd: 5'-ATGGAGTCTTGGAGCTATGTC-3'<br>rev: 5'-TCATTTTCATGGAACGTCTTTGATG-3'            | Overexpression in <i>N. benthamiana</i>                     |
| SlySBP8b                    | fwd: 5'-ATGTTGGACTATGAATGGGAAAATC-3'<br>rev: 5'-TTAGTCACCCATTGGAAAAGAAG-3'          | Overexpression in <i>N. benthamiana</i> / CoIP/localization |
| SlySBP12a                   | fwd: 5'-ATGGAAGCGAGTGTGG-3'<br>rev: 5'-TCAGCTTGTTCCAAAGTCC-3'                       | Overexpression in <i>N. benthamiana</i> / CoIP/localization |
| SlySBP12a( $\Delta$ TMD)    | fwd: SlySBP12a fwd primer<br>rev: 5'-TCATGATATCTCTAAGCTGGTGGTTG -3'                 | Overexpression in <i>N. benthamiana</i> / localization      |
| TMD <sub>SlySBP12a</sub>    | fwd: 5'-ATGACTGAGAGAAAAGCCATTCC-3'<br>rev: SlySBP12a rev primer                     | Overexpression in <i>N. benthamiana</i> / localization      |
| attB1 adaptor               | 5'-GGGGACAAGTTTGTACAAAAAAGCAGGCTGG-3'                                               | Gateway <sup>TM</sup> cloning                               |
| attB2 adaptor               | 5'-GGGGACCACTTTGTACAAGAAAGCTGGGTG-3'                                                | Gateway <sup>TM</sup> cloning                               |

**Supplementary Table S2:** Genes involved in stress responses with an SBP cis-element in their promoter. LMM – lesion mimic mutant.

| <b>Locus ID</b> | <b>Description</b>        | <b>LMM</b> |
|-----------------|---------------------------|------------|
| At5g40440       | TIR-NBS-LRR               | no         |
| At5g48770       | TIR-NBS-LRR               | no         |
| At4g16860       | RPP4                      | yes        |
| At5g45260       | RRS1 (WRKY 52)            | yes        |
| At2g35930       | AtPUB23                   | no         |
| At1g13960       | WRKY 4                    | no         |
| At4g01250       | WRKY 22                   | no         |
| At5g15130       | WRKY 72                   | no         |
| At1g79110       | BOI-related gene 2 (BRG2) | no         |
| At1g76580       | Contains SBP-box domain   | no         |

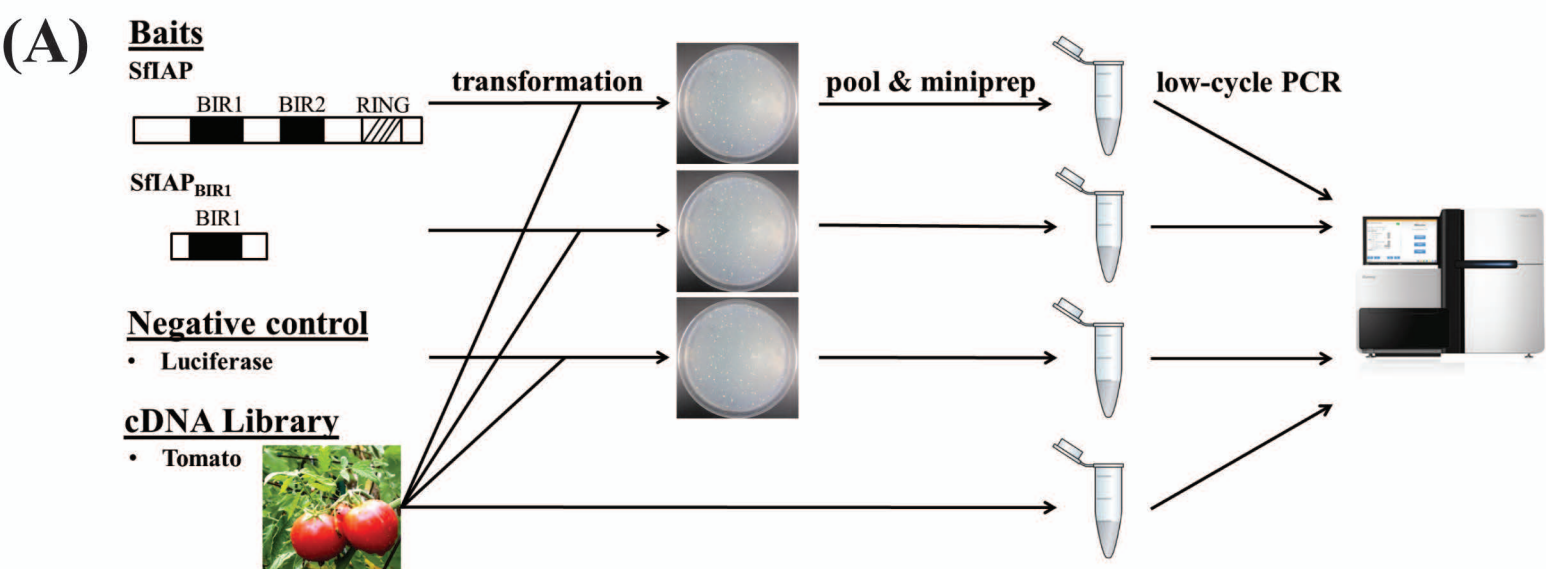

**(B)**

$$\text{Enrichment} = \frac{FPKM_{bait} - FPKM_{luciferase}}{FPKM_{bait} + FPKM_{luciferase} + FPKM_{library}} \times 100$$

**Supplementary Fig. S1.** Summary of the (A) QIS-Seq approach used to identify SfIAP-interacting partners and (B) the equation used to calculate enrichment scores for each gene.

**SlySBP-like**

1 19 93 132

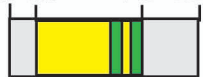**SlySBP4**

1 43 117 147

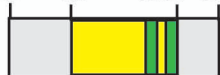**SlySBP6a**

1 167 241 524

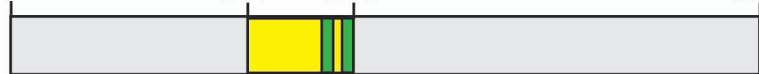**SlySBP6c**

1 93 167 447

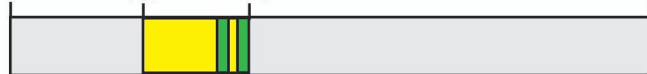**SlySBP8b**

1 166 240 299

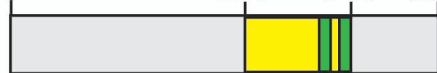**SlySBP12a**

1 146 220 742 842 953 994

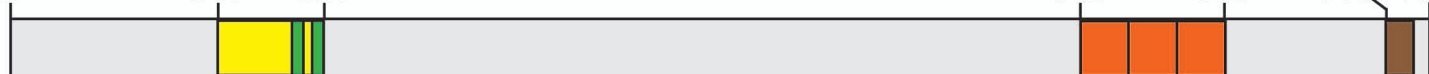

**Supplementary Fig. S2.** Diagram of SlySBP proteins overexpressed in *N. benthamiana*. Numbers represent amino acid positions. Yellow – SBP domain. Green – NLS. Orange – Ankyrin repeats. Brown – TMD. HMMER (hmmmer.org) was used in conjunction with a Pfam database to identify conserved protein domains.

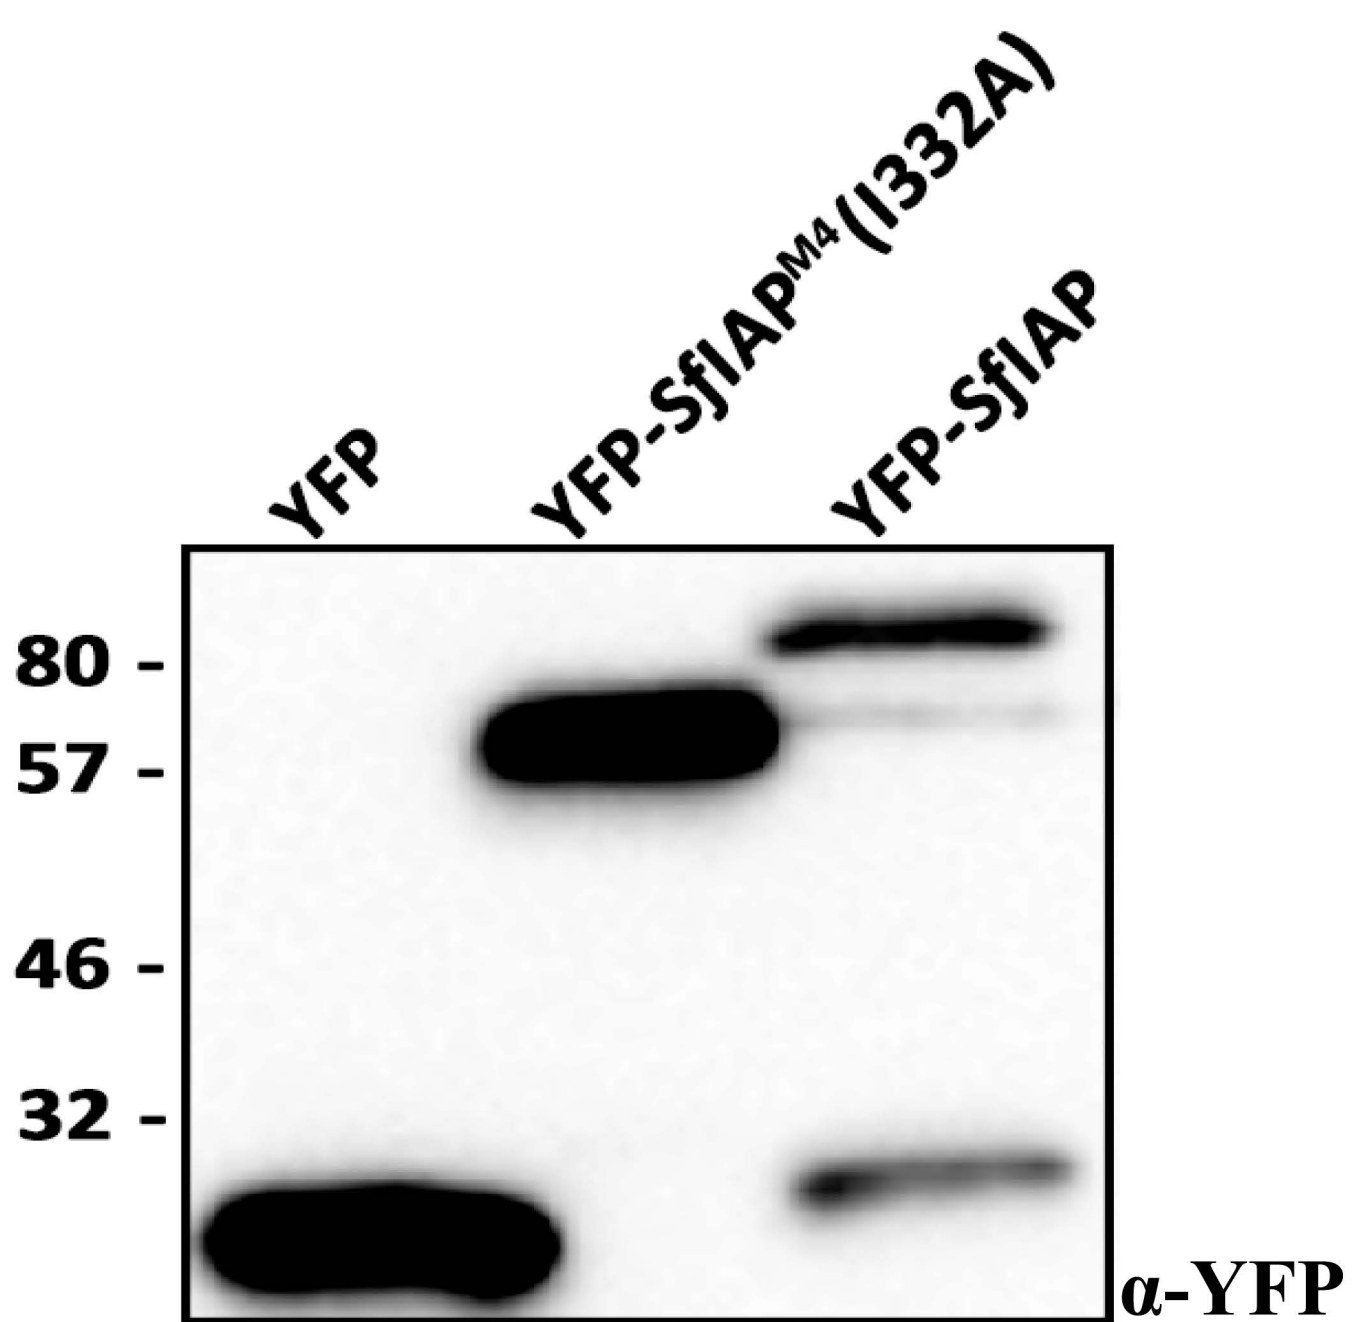

**Supplementary Fig. S3.** Western blot confirms SfIAP<sup>M4</sup>(I332A) is not cleaved at its N-terminus. Leaves from *N. benthamiana* transiently transformed with *35S:YFP*, *35S:YFP-SfIAP<sup>M4</sup>(I332A)*, or *35S:YFP-SfIAP* were collected 2 days post-transformation. An  $\alpha$ -YFP antibody was used to detect protein accumulation.

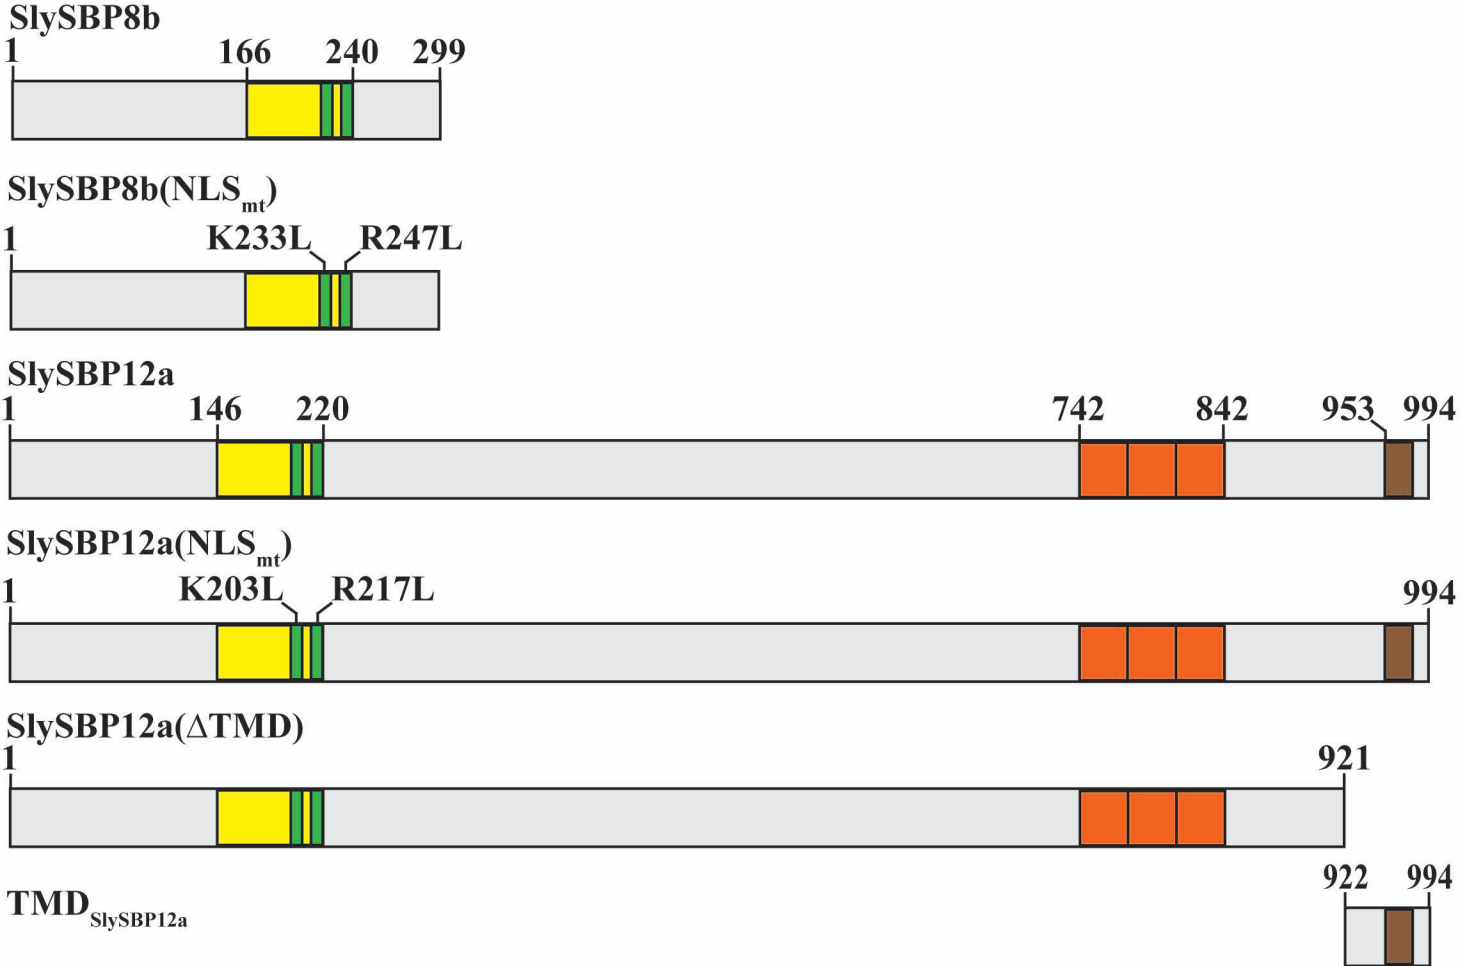

**Supplementary Fig. S4.** Diagram of wild-type and mutant SlySBP8b and -12a constructs used in this study. Numbers represent amino acid positions. Yellow – SBP domain. Green – NLS. Orange – Ankyrin repeats. Brown – TMD. HMMER (hmm-mer.org) was used in conjunction with a Pfam database to identify conserved protein domains.

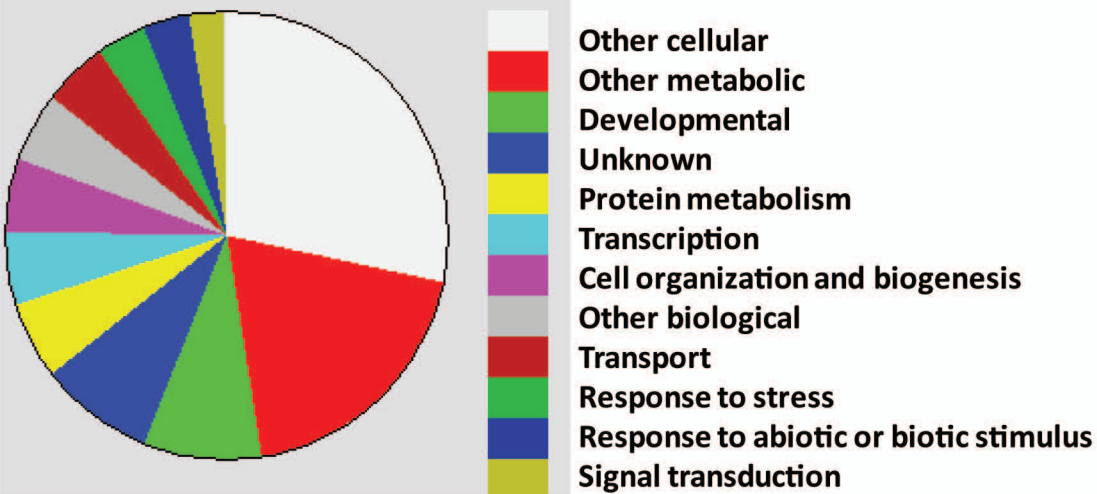

**Supplementary Fig. S5.** Pie chart summarizing the biological functions of genes containing the SBP cis-element in their promoter region.



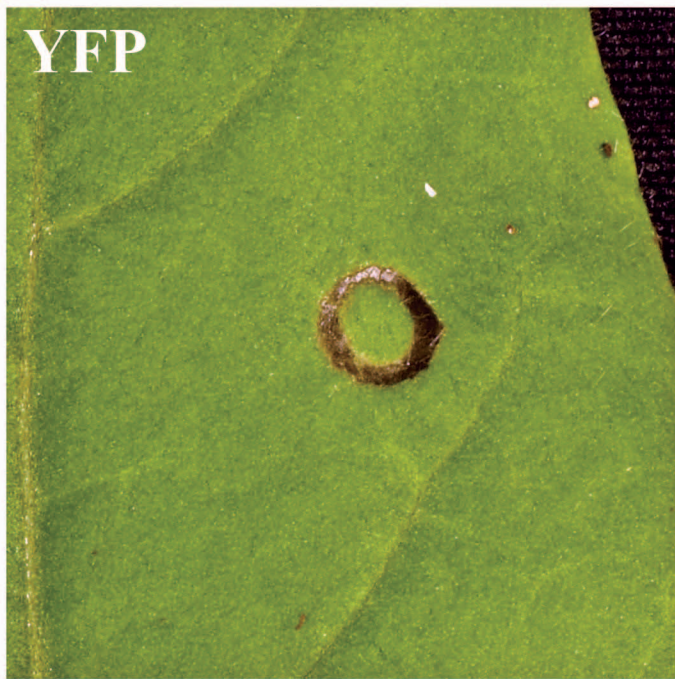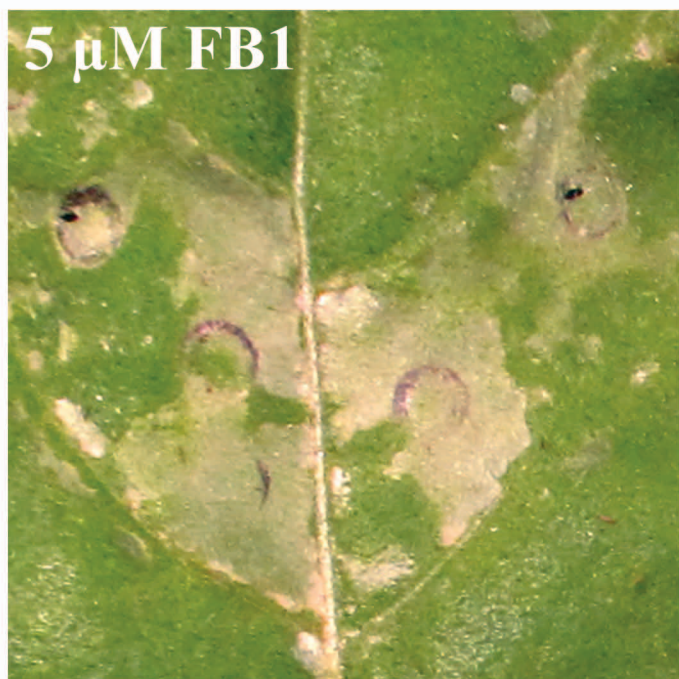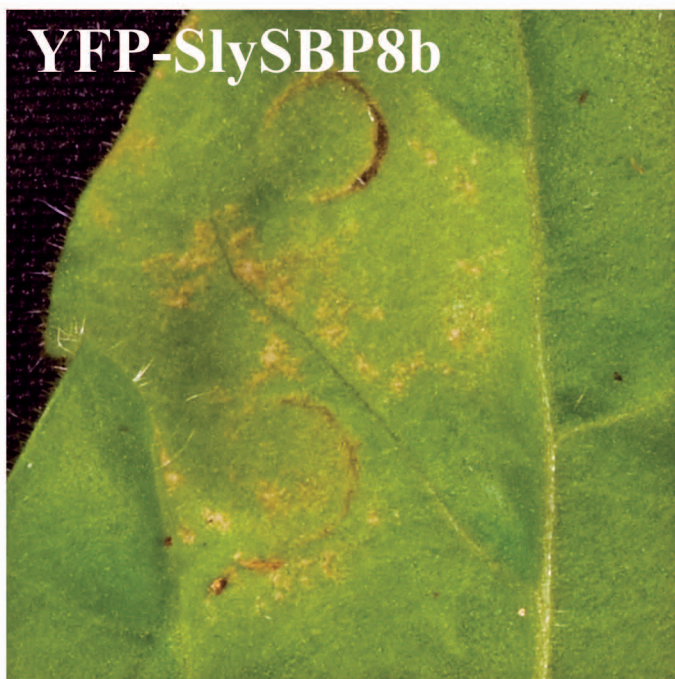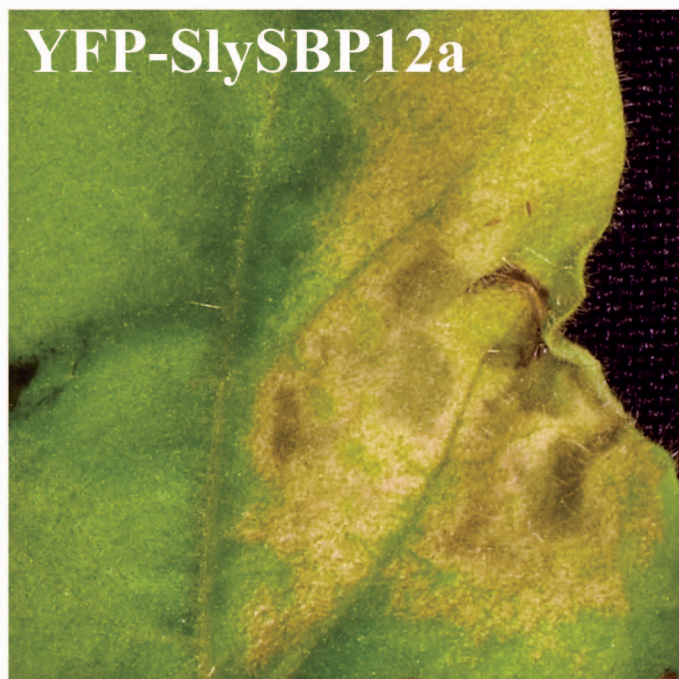

**Supplementary Fig. S6.** Cell death induced by overexpression of *SlySBP8b* and *SlySBP12a* in *N. glutinosa*. Leaves were transformed with *35S:YFP*, *35S:YFP-SlySBP8b*, and *35S:YFP-SlySBP12a*. Leaves were treated with 5  $\mu$ M FB1 by coinfiltrating with *Agrobacterium* carrying *35S:YFP*. Images of leaves were taken 5 days post-transformation.
